# Supplementary material for: Copy Number Alteration and Uniparental Disomy Analysis Categorizes Japanese Papillary Thyroid Carcinomas into Distinct Groups
Source: PubMed Central journal article supplement (PMC3340412; doi:10.1371/journal.pone.0036063), 2012-04-30

Supplemental figure S2

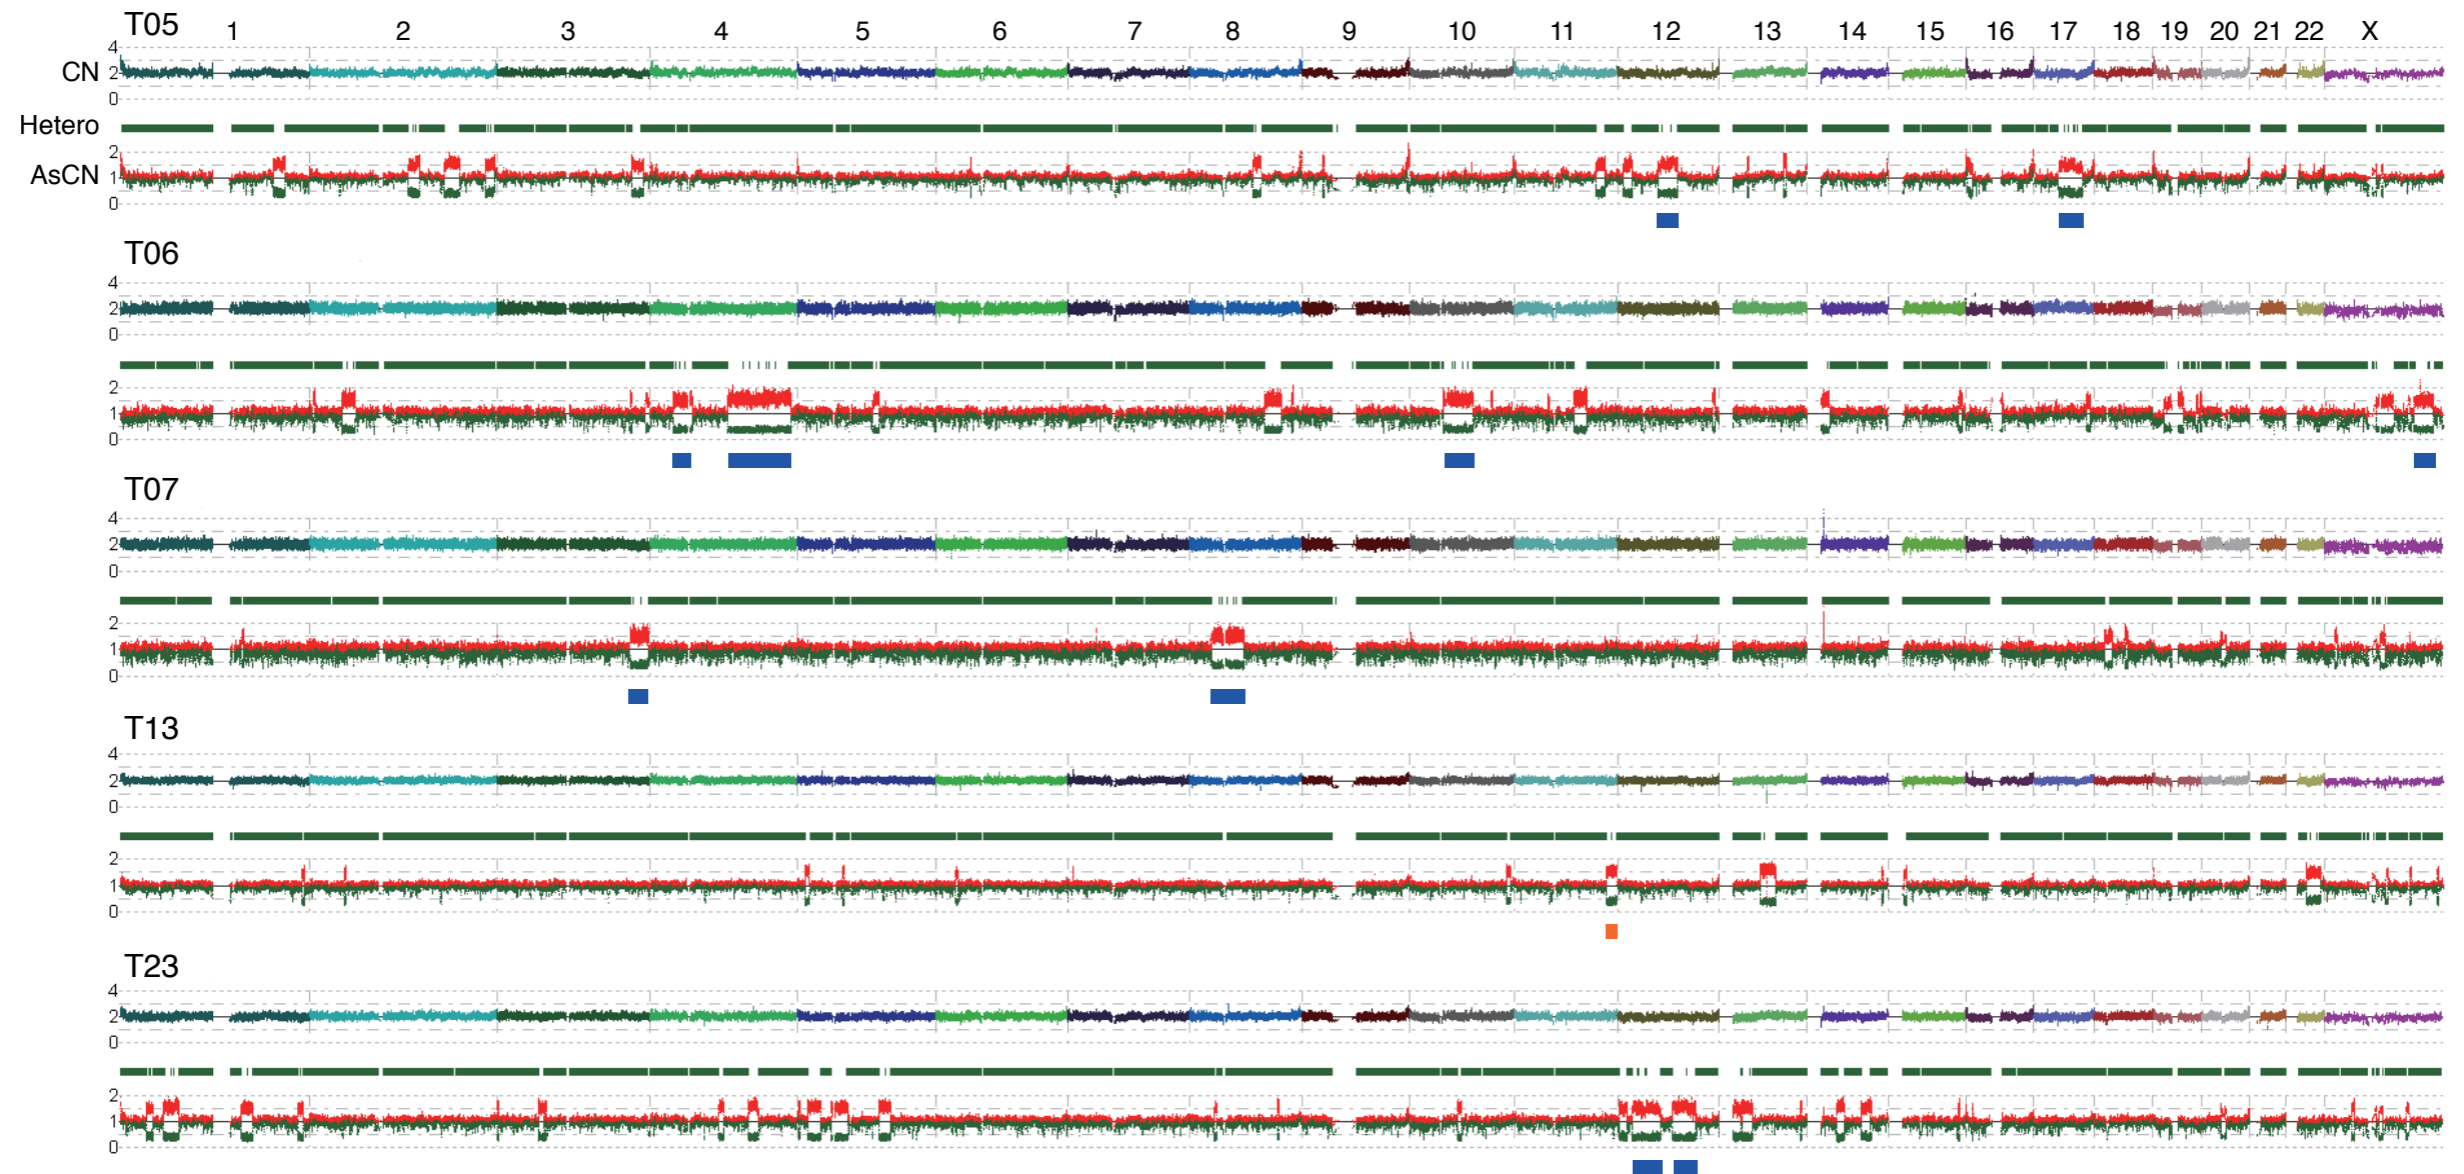

Supplement: pone.0036063.s002.pdf [file pone.0036063.s002.pdf]
