# Supplementary material for: Copy Number Alteration and Uniparental Disomy Analysis Categorizes Japanese Papillary Thyroid Carcinomas into Distinct Groups
Source: PubMed Central journal article supplement (PMC3340412; doi:10.1371/journal.pone.0036063), 2012-04-30
Supplement: pone.0036063.s003.pdf [file pone.0036063.s003.pdf]

**Supplemental Table S1.** Primer sequences

| Gene            | Codon | Primer sequence                                                             | Annealing Temperature (°C) | Amplicon size (bp) |
|-----------------|-------|-----------------------------------------------------------------------------|----------------------------|--------------------|
| <i>BRAF</i>     | 600   | 5'-ACATACTTATTGACTCTAAGAGGAAAGATGAA-3'<br>5'-GATTTTTGTGAATACTGGGAACTATGA-3' | 60                         | 400                |
| <i>H-RAS</i>    | 12/13 | 5'-AGCAGGGCCCTCCTTGGCAG-3'<br>5'-CAGCCAGCCCTATCCTGGCTG-3'                   | 65                         | 261                |
|                 | 61    | 5'-CAGGGAGAGGCTGGCTGTGTG-3'<br>5'-CCACCTGTGCGGCGTGGGCT-3'                   | 65                         | 298                |
| <i>K-RAS</i>    | 12/13 | 5'-GGTACTGGTGGAGTATTTGATAGT-3'<br>5'-CTCATGAAAATGGTCAGAGAAACCT-3'           | 60                         | 290                |
|                 | 61    | 5'-GGTGCACTGTAATAATCCAGACTG-3'<br>5'-CTATAATTACTCCTTAATGTCAGCTT-3'          | 60                         | 268                |
| <i>N-RAS</i>    | 12/13 | 5'-CACACTAGGGTTTTTCATTTCCATTG-3'<br>5'-GGTAAAGATGATCCGACAAGTGAG-3'          | 63                         | 283                |
|                 | 61    | 5'-TTGAACTTCCCTCCCTCCCTGC-3'<br>5'-AGCTCTATCTTCCCTAGTGTGGTAA-3'             | 65                         | 316                |
| <i>RET/PTC1</i> |       | 5'-GCCTGGAGGACCTCACCAA-3'<br>5'-CTCTGCCTTTCAGATGGAA-3'                      | 56                         | 255                |
| <i>RET/PTC3</i> |       | 5'-ACCTGCCAGTGGTTATCAAGC-3'<br>5'-TTCGCCTTCTCCTAGAGTTTTTCC-3'               | 59                         | 150                |
