# Supplementary material for: Copy Number Alteration and Uniparental Disomy Analysis Categorizes Japanese Papillary Thyroid Carcinomas into Distinct Groups
Source: PubMed Central journal article supplement (PMC3340412; doi:10.1371/journal.pone.0036063), 2012-04-30
Supplement: pone.0036063.s004.pdf [file pone.0036063.s004.pdf]

Supplemental Table S2. Chromosomal aberrations in Japanese PTCs

| Case | cytoband            | chr | start       | end         | length (bp) | Genomic alteration        | Group           |
|------|---------------------|-----|-------------|-------------|-------------|---------------------------|-----------------|
| T13  | 11q23.3 - 11q25     | 11  | 120,599,042 | 134,449,982 | 13,850,941  | Telomere UPD              | <i>BRAF+</i>    |
| T13  | 13q21.1 - 13q22.2   | 13  | 53,937,874  | 74,333,453  | 20,395,580  | Interstitial UPD <24.6Mb  | <i>BRAF+</i>    |
| T13  | 22q12.1 - 22q13.31  | 22  | 25,968,662  | 44,398,349  | 18,429,688  | Interstitial UPD <24.6Mb  | <i>BRAF+</i>    |
| T15  | 16p13.11 - 16p12.1  | 16  | 15,406,308  | 25,963,493  | 10,557,186  | Interstitial UPD <24.6Mb  | <i>BRAF+</i>    |
| T17  | 1p36.32 - 1p11.1    | 1   | 3,734,952   | 121,184,515 | 117,449,564 | Deletion                  | <i>BRAF+</i>    |
| T17  | 1q12 - 1q44         | 1   | 141,510,591 | 247,165,315 | 105,654,725 | Interstitial UPD ≥24.6 Mb | <i>BRAF+</i>    |
| T17  | 9p24.3 - 9q34.3     | 9   | 36,587      | 140,051,485 | 140,014,899 | Deletion                  | <i>BRAF+</i>    |
| T17  | 12p13.33 - 12p13.32 | 12  | 1,735,795   | 4,846,088   | 3,110,294   | Deletion                  | <i>BRAF+</i>    |
| T17  | 12p13.2             | 12  | 11,663,693  | 12,411,391  | 747,699     | Deletion                  | <i>BRAF+</i>    |
| T17  | 12p12.1             | 12  | 21,211,759  | 25,041,297  | 3,829,539   | Deletion                  | <i>BRAF+</i>    |
| T17  | 12p11.22            | 12  | 27,727,113  | 28,376,271  | 649,159     | Deletion                  | <i>BRAF+</i>    |
| T17  | 12p11.21 - 12p11.1  | 12  | 31,414,767  | 33,274,165  | 1,859,399   | Deletion                  | <i>BRAF+</i>    |
| T17  | 12q12               | 12  | 37,759,814  | 39,679,272  | 1,919,459   | Deletion                  | <i>BRAF+</i>    |
| T17  | 12q12               | 12  | 40,683,571  | 41,714,348  | 1,030,778   | Deletion                  | <i>BRAF+</i>    |
| T17  | 12q12               | 12  | 43,066,755  | 43,804,551  | 737,797     | Deletion                  | <i>BRAF+</i>    |
| T17  | 12q13.11 - 12q13.13 | 12  | 45,516,553  | 50,097,565  | 4,581,013   | Deletion                  | <i>BRAF+</i>    |
| T17  | 12q13.13            | 12  | 50,799,502  | 51,516,034  | 716,533     | Amplification             | <i>BRAF+</i>    |
| T17  | 12q13.13 - 12q13.2  | 12  | 52,693,168  | 53,459,334  | 766,167     | Deletion                  | <i>BRAF+</i>    |
| T17  | 12q21.2             | 12  | 74,456,393  | 75,555,293  | 1,098,901   | Deletion                  | <i>BRAF+</i>    |
| T17  | 12q21.31            | 12  | 78,845,628  | 79,524,296  | 678,669     | Deletion                  | <i>BRAF+</i>    |
| T17  | 12q21.31            | 12  | 80,049,860  | 80,204,711  | 154,852     | Deletion                  | <i>BRAF+</i>    |
| T17  | 12q21.31 - 12q21.32 | 12  | 85,010,138  | 86,458,591  | 1,448,454   | Deletion                  | <i>BRAF+</i>    |
| T17  | 12q21.32 - 12q21.33 | 12  | 86,626,715  | 87,948,168  | 1,321,454   | Deletion                  | <i>BRAF+</i>    |
| T17  | 12q21.33            | 12  | 88,087,657  | 88,330,873  | 243,217     | Deletion                  | <i>BRAF+</i>    |
| T17  | 12q22 - 12q23.1     | 12  | 92,803,212  | 95,656,784  | 2,853,573   | Deletion                  | <i>BRAF+</i>    |
| T17  | 12q23.1             | 12  | 97,054,890  | 98,577,685  | 1,522,796   | Deletion                  | <i>BRAF+</i>    |
| T17  | 12q23.3             | 12  | 104,304,452 | 105,804,313 | 1,499,862   | Deletion                  | <i>BRAF+</i>    |
| T17  | 12q24.13            | 12  | 111,247,474 | 112,401,485 | 1,154,012   | Deletion                  | <i>BRAF+</i>    |
| T17  | 12q24.31 - 12q24.32 | 12  | 123,098,750 | 126,680,137 | 3,581,388   | Deletion                  | <i>BRAF+</i>    |
| T17  | 12q24.33            | 12  | 129,770,792 | 131,722,958 | 1,952,167   | Deletion                  | <i>BRAF+</i>    |
| T17  | 18p11.32 - 18q21.1  | 18  | 190,416     | 45,359,569  | 45,169,154  | Deletion                  | <i>BRAF+</i>    |
| T17  | 22q11.1 - 22q13.33  | 22  | 14,857,285  | 49,286,917  | 34,429,633  | Deletion                  | <i>BRAF+</i>    |
| T21  | 22q11.1 - 22q13.33  | 22  | 14,780,993  | 48,960,610  | 34,179,618  | Deletion                  | <i>BRAF+</i>    |
| T23  | 1p32.2 - 1p31.1     | 1   | 56,903,176  | 76,557,224  | 19,654,049  | Interstitial UPD <24.6Mb  | <i>BRAF+</i>    |
| T23  | 1q23.2 - 1q25.1     | 1   | 158,056,061 | 173,439,162 | 15,383,102  | Interstitial UPD <24.6Mb  | <i>BRAF+</i>    |
| T23  | 4q28.1 - 4q31.1     | 4   | 127,417,835 | 140,753,568 | 13,335,734  | Interstitial UPD <24.6Mb  | <i>BRAF+</i>    |
| T23  | 5p15.2 - 5p13.3     | 5   | 13,782,714  | 30,975,726  | 17,193,013  | Interstitial UPD <24.6Mb  | <i>BRAF+</i>    |
| T23  | 5p12 - 5q12.3       | 5   | 44,428,734  | 65,946,072  | 21,517,339  | Interstitial UPD <24.6Mb  | <i>BRAF+</i>    |
| T23  | 5q21.3 - 5q23.1     | 5   | 106,877,336 | 121,216,508 | 14,339,173  | Interstitial UPD <24.6Mb  | <i>BRAF+</i>    |
| T23  | 12p13.33 - 12p13.1  | 12  | 2,049,021   | 12,637,852  | 10,588,832  | Interstitial UPD <24.6Mb  | <i>BRAF+</i>    |
| T23  | 12p12.2 - 12q13.3   | 12  | 20,131,592  | 56,232,127  | 36,100,536  | Interstitial UPD ≥24.6 Mb | <i>BRAF+</i>    |
| T23  | 12q21.1 - 12q23.2   | 12  | 71,297,634  | 101,654,192 | 30,356,559  | Interstitial UPD ≥24.6 Mb | <i>BRAF+</i>    |
| T23  | 13q11 - 13q12.3     | 13  | 18,113,674  | 28,938,001  | 10,824,328  | Interstitial UPD <24.6Mb  | <i>BRAF+</i>    |
| T23  | 13q12.3 - 13q14.11  | 13  | 30,025,975  | 43,134,266  | 13,108,292  | Interstitial UPD <24.6Mb  | <i>BRAF+</i>    |
| T23  | 14q24.2 - 14q31.1   | 14  | 70,422,251  | 82,328,673  | 11,906,423  | Interstitial UPD <24.6Mb  | <i>BRAF+</i>    |
| T05  | 1q32.1 - 1q41       | 1   | 199,437,906 | 215,295,755 | 15,857,850  | Interstitial UPD <24.6Mb  | <i>wt</i>       |
| T05  | 2q14.3 - 2q22.1     | 2   | 128,122,391 | 142,212,677 | 14,090,287  | Interstitial UPD <24.6Mb  | <i>wt</i>       |
| T05  | 2q31.1 - 2q32.3     | 2   | 174,419,674 | 194,612,336 | 20,192,663  | Interstitial UPD <24.6Mb  | <i>wt</i>       |
| T05  | 2q36.3 - 2q37.3     | 2   | 227,747,402 | 239,939,302 | 12,191,901  | Interstitial UPD <24.6Mb  | <i>wt</i>       |
| T05  | 3q26.31 - 3q28      | 3   | 175,896,645 | 190,526,993 | 14,630,349  | Interstitial UPD <24.6Mb  | <i>wt</i>       |
| T05  | 8q21.13 - 8q21.3    | 8   | 82,316,787  | 93,459,316  | 11,142,530  | Interstitial UPD <24.6Mb  | <i>wt</i>       |
| T05  | 11q22.3 - 11q23.3   | 11  | 107,084,771 | 119,208,981 | 12,124,211  | Interstitial UPD <24.6Mb  | <i>wt</i>       |
| T05  | 12p13.31 - 12p12.3  | 12  | 8,007,288   | 19,688,787  | 11,681,500  | Interstitial UPD <24.6Mb  | <i>wt</i>       |
| T05  | 12q13.2 - 12q21.2   | 12  | 53,197,104  | 78,294,659  | 25,097,556  | Interstitial UPD ≥24.6 Mb | <i>wt</i>       |
| T05  | 17q12 - 17q24.2     | 17  | 32,095,746  | 63,137,043  | 31,041,298  | Interstitial UPD ≥24.6 Mb | <i>wt</i>       |
| T06  | 2p21 - 2p16.1       | 2   | 41,957,481  | 59,226,475  | 17,268,995  | Interstitial UPD <24.6Mb  | <i>wt</i>       |
| T06  | 4p15.1 - 4q12       | 4   | 29,575,338  | 55,005,069  | 25,429,732  | Interstitial UPD ≥24.6 Mb | <i>wt</i>       |
| T06  | 4q23 - 4q35.1       | 4   | 101,448,476 | 182,929,392 | 81,480,917  | Interstitial UPD ≥24.6 Mb | <i>wt</i>       |
| T06  | 8q22.1 - 8q24.11    | 8   | 97,183,808  | 119,185,600 | 22,001,793  | Interstitial UPD <24.6Mb  | <i>wt</i>       |
| T06  | 10q11.21 - 10q23.1  | 10  | 43,423,622  | 82,409,749  | 38,986,128  | Interstitial UPD ≥24.6 Mb | <i>wt</i>       |
| T06  | 11q14.1 - 11q21     | 11  | 78,592,389  | 95,070,831  | 16,478,443  | Interstitial UPD <24.6Mb  | <i>wt</i>       |
| T06  | 14q11.2 - 14q12     | 14  | 19,281,484  | 29,648,517  | 10,367,034  | Interstitial UPD <24.6Mb  | <i>wt</i>       |
| T06  | Xq13.1 - Xq21.31    | X   | 68,398,493  | 90,023,794  | 21,625,302  | Interstitial UPD <24.6Mb  | <i>wt</i>       |
| T06  | Xq24 - Xq27.3       | X   | 116,906,013 | 142,428,335 | 25,522,323  | Interstitial UPD ≥24.6 Mb | <i>wt</i>       |
| T32  | 3p26.3 - 3p25.2     | 3   | 35,345      | 12,306,320  | 12,270,976  | Deletion                  | <i>wt</i>       |
| T32  | 7q31.32 - 7q36.3    | 7   | 121,540,345 | 158,819,766 | 37,279,422  | Amplification             | <i>wt</i>       |
| T36  | 2p23.2 - 2p22.2     | 2   | 29,300,617  | 36,995,231  | 7,694,615   | Deletion                  | <i>wt</i>       |
| T48  | 22q11.1 - 22q13.33  | 22  | 15,986,921  | 49,581,322  | 33,594,402  | Deletion                  | <i>wt</i>       |
| T50  | 1q12 - 1q44         | 1   | 141,510,591 | 247,191,012 | 105,680,422 | Amplification             | <i>wt</i>       |
| T07  | 3q26.31 - 3q29      | 3   | 173,269,668 | 197,898,556 | 24,628,889  | Interstitial UPD ≥24.6 Mb | <i>wt</i>       |
| T07  | 8p21.1 - 8q13.3     | 8   | 29,271,088  | 71,028,133  | 41,757,046  | Interstitial UPD ≥24.6 Mb | <i>wt</i>       |
| T19  | 10q11.21 - 10q21.2  | 10  | 45,939,485  | 61,302,814  | 15,363,330  | Deletion                  | <i>RET/PTC1</i> |
| T19  | 22q11.1 - 22q13.33  | 22  | 14,432,528  | 49,518,269  | 35,085,742  | Deletion                  | <i>RET/PTC1</i> |
