# Supplementary material for: Copy Number Alteration and Uniparental Disomy Analysis Categorizes Japanese Papillary Thyroid Carcinomas into Distinct Groups
Source: PubMed Central journal article supplement (PMC3340412; doi:10.1371/journal.pone.0036063), 2012-04-30
Supplement: pone.0036063.s005.pdf [file pone.0036063.s005.pdf]

**Supplemental Table S3. CancerGenes located in recurrent chromosome 22q deletion**

| Gene Symbol | Gene Name                                                                                         | GO Categories                                                                                                                                                                                                                                                                                                                                                                                                                                                                                                                      | Sources                                                                                                                                |
|-------------|---------------------------------------------------------------------------------------------------|------------------------------------------------------------------------------------------------------------------------------------------------------------------------------------------------------------------------------------------------------------------------------------------------------------------------------------------------------------------------------------------------------------------------------------------------------------------------------------------------------------------------------------|----------------------------------------------------------------------------------------------------------------------------------------|
| PRODH       | proline dehydrogenase (oxidase) 1                                                                 | cellular_component;glutamate biosynthetic process;induction of apoptosis by oxidative stress;mitochondrion;molecular_function;oxidoreductase activity;proline catabolic process;proline dehydrogenase activity                                                                                                                                                                                                                                                                                                                     | Stability, Tumor Suppressor                                                                                                            |
| TSSK2       | testis-specific serine kinase 2                                                                   | ATP binding;cell differentiation;regulation of exocytosis;magnesium ion binding;multicellular organismal development;nucleotide binding;protein amino acid phosphorylation;protein binding;protein serine/threonine kinase activity;spermatogenesis;transferase activity                                                                                                                                                                                                                                                           | Protein Kinase                                                                                                                         |
| CLTCL1      | clathrin, heavy chain-like 1                                                                      | anatomical structure morphogenesis;binding;clathrin vesicle coat;coated pit;receptor-mediated endocytosis;signal transducer activity                                                                                                                                                                                                                                                                                                                                                                                               | Futreal et al 2004, Mitelman 2000, Translocation                                                                                       |
| GP1BB       | septin 5                                                                                          | cell cycle;cytokinesis;GTP binding;GTPase activity;nucleotide binding;plasma membrane;protein binding;regulation of exocytosis;structural molecule activity;synaptic vesicle;synaptic vesicle targeting                                                                                                                                                                                                                                                                                                                            | Futreal et al 2004, Mitelman 2000, Translocation                                                                                       |
| COMT        | catechol-O-methyltransferase                                                                      | catechol O-methyltransferase activity;catecholamine metabolic process;dopamine catabolic process;integral to membrane;magnesium ion binding;membrane;microsome;O-methyltransferase activity;protein binding;soluble fraction;transferase activity                                                                                                                                                                                                                                                                                  | Stability                                                                                                                              |
| CRKL        | v-crk sarcoma virus CT10 oncogene homolog (avian)-like                                            | anterior/posterior pattern formation;blood vessel development;cell motility;heart development;intracellular signaling cascade;JNK cascade;organ morphogenesis;parathyroid gland development;pattern specification process;protein amino acid phosphorylation;protein binding;protein-tyrosine kinase activity;Ras protein signal transduction;SH3/SH2 adaptor activity;thymus development                                                                                                                                          | EGFR1, Kit Receptor, Protein Kinase, Entrez Query;Oncogene                                                                             |
| UBE2L3      | ubiquitin-conjugating enzyme E2L 3                                                                | enzyme binding;ligase activity;protein modification process;small conjugating protein ligase activity;ubiquitin cycle;ubiquitin ligase complex;ubiquitin-dependent protein catabolic process;ubiquitin-protein ligase activity                                                                                                                                                                                                                                                                                                     | TGFBR                                                                                                                                  |
| MAPK1       | mitogen-activated protein kinase 1                                                                | ATP binding;cell cycle;chemotaxis;cytoplasm;cytosine metabolic process;induction of apoptosis;MAP kinase activity;MAPKKK cascade;negative regulation of cell differentiation;nucleotide binding;nucleus;organ morphogenesis;phosphotyrosine binding;protein amino acid phosphorylation;protein binding;protein serine/threonine kinase activity;response to DNA damage stimulus;signal transduction;synaptic transmission;transferase activity                                                                                     | Protein Kinase, Stability, Tumor Suppressor, Entrez Query;Oncogene                                                                     |
| TOP3B       | topoisomerase (DNA) III beta                                                                      | chromosome organization and biogenesis (sensu Eukaryota);chromosome segregation;condensed chromosome;DNA modification;DNA topoisomerase type I activity;DNA topological change;DNA unwinding during replication;nucleus;protein binding                                                                                                                                                                                                                                                                                            | Stability                                                                                                                              |
| RAB36       | RAB36, member RAS oncogene family                                                                 | Golgi apparatus;GTP binding;GTPase activity;nucleotide binding;protein transport;small GTPase mediated signal transduction                                                                                                                                                                                                                                                                                                                                                                                                         | Entrez Query;Oncogene                                                                                                                  |
| BCR         | breakpoint cluster region                                                                         | cellular_component;GTPase activator activity;guanyl-nucleotide exchange factor activity;intracellular;intracellular signaling cascade;kinase activity;protein amino acid phosphorylation;protein serine/threonine kinase activity;regulation of Rho protein signal transduction;Rho guanyl-nucleotide exchange factor activity;signal transduction;transferase activity                                                                                                                                                            | Futreal et al 2004, Mitelman 2000, Tumor Suppressor, Entrez Query;Oncogene, Translocation                                              |
| RGL4        | -                                                                                                 | guanyl-nucleotide exchange factor activity;intracellular;small GTPase mediated signal transduction                                                                                                                                                                                                                                                                                                                                                                                                                                 | Entrez Query;Oncogene                                                                                                                  |
| MMP11       | matrix metalloproteinase 11 (stromelysin 3)                                                       | anatomical structure morphogenesis;calcium ion binding;collagen catabolic process;multicellular organismal development;proteinaceous extracellular matrix;proteolysis;stromelysin 3 activity;zinc ion binding                                                                                                                                                                                                                                                                                                                      | Stability                                                                                                                              |
| SMARCB1     | SWI/SNF related, matrix associated, actin dependent regulator of chromatin, subfamily b, member 1 | cell cycle;chromatin remodeling;DNA integration;negative regulation of progression through cell cycle;nuclear chromosome;nucleoplasm;nucleus;protein binding;regulation of transcription from RNA polymerase II promoter;retroviral genome replication;SWI/SNF complex;transcription                                                                                                                                                                                                                                               | Futreal et al 2004, Tumor Suppressor, Entrez Query;Oncogene, Frameshift mutation, Large deletion, Nonsense mutation, Splicing mutation |
| MIF         | macrophage migration inhibitory factor (glycosylation-inhibiting factor)                          | cell proliferation;cell surface receptor linked signal transduction;cytokine activity;extracellular region;extracellular space;inflammatory response;isomerase activity;negative regulation of apoptosis;phenylpyruvate tautomerase activity;prostaglandin biosynthetic process;protein binding;regulation of macrophage activation                                                                                                                                                                                                | Protein Kinase, Stability                                                                                                              |
| GSTT1       | glutathione S-transferase theta 1                                                                 | glutathione transferase activity;response to stress;transferase activity                                                                                                                                                                                                                                                                                                                                                                                                                                                           | Stability                                                                                                                              |
| ADORA2A     | adenosine A2a receptor                                                                            | A2A adenosine receptor activity, G-protein coupled;adenylate cyclase activation;apoptosis;blood coagulation;cAMP biosynthetic process;cell-cell signaling;cellular defense response;central nervous system development;circulation;G-protein coupled receptor protein signaling pathway;G-protein signaling, coupled to cAMP nucleotide second messenger;gastric inhibitory peptide receptor activity;inflammatory response;integral to membrane;integral to plasma membrane;membrane;membrane fraction;neurotransmitter transport | Stability                                                                                                                              |
| ADRBK2      | adrenergic, beta, receptor kinase 2                                                               | ATP binding;G-protein coupled receptor kinase activity;nucleotide binding;protein amino acid phosphorylation;signal transducer activity;signal transduction;transferase activity                                                                                                                                                                                                                                                                                                                                                   | Protein Kinase                                                                                                                         |
| MYO18B      | myosin XVIIIIB                                                                                    | actin binding;ATP binding;motor activity;nucleotide binding;nucleus;unconventional myosin complex                                                                                                                                                                                                                                                                                                                                                                                                                                  | Tumor Suppressor                                                                                                                       |
| CRYBB1      | crystallin, beta B1                                                                               | structural constituent of eye lens;visual perception                                                                                                                                                                                                                                                                                                                                                                                                                                                                               | Stability                                                                                                                              |
| MN1         | meningioma (disrupted in balanced translocation) 1                                                | biological_process;cell cycle;cellular_component;molecular_function;negative regulation of progression through cell cycle                                                                                                                                                                                                                                                                                                                                                                                                          | Futreal et al 2004, Mitelman 2000, Tumor Suppressor, Entrez Query;Oncogene, Translocation                                              |
| CHEK2       | CHK2 checkpoint homolog (S. pombe)                                                                | ATP binding;cell cycle;DNA damage checkpoint;DNA damage response, signal transduction resulting in induction of apoptosis;magnesium ion binding;nucleotide binding;nucleus;PML body;protein amino acid phosphorylation;protein binding;protein serine/threonine kinase activity;transferase activity                                                                                                                                                                                                                               | Futreal et al 2004, Protein Kinase, Stability, Tumor Suppressor, Frameshift mutation                                                   |

|         |                                                                                         |                                                                                                                                                                                                                                                                                                                                                                                                                                                                                                                                  |                                                                                                                                                                                                         |
|---------|-----------------------------------------------------------------------------------------|----------------------------------------------------------------------------------------------------------------------------------------------------------------------------------------------------------------------------------------------------------------------------------------------------------------------------------------------------------------------------------------------------------------------------------------------------------------------------------------------------------------------------------|---------------------------------------------------------------------------------------------------------------------------------------------------------------------------------------------------------|
| EWSR1   | Ewing sarcoma breakpoint region 1                                                       | calmodulin binding;intracellular;metal ion binding;nucleic acid binding;nucleotide binding;nucleus;regulation of transcription, DNA-dependent;RNA binding;transcription;zinc ion binding                                                                                                                                                                                                                                                                                                                                         | Futreal et al 2004, Mitelman 2000, Vogelstein and Kinzler 2004, Entrez Query;Oncogene, Translocation                                                                                                    |
| RASL10A | RAS-like, family 10, member A                                                           | GTP binding;GTPase activity;intracellular;membrane;nucleotide binding;small GTPase mediated signal transduction                                                                                                                                                                                                                                                                                                                                                                                                                  | Tumor Suppressor                                                                                                                                                                                        |
| NF2     | neurofibromin 2 (bilateral acoustic neuroma)                                            | cell cycle;cytoplasm;cytoskeletal protein binding;cytoskeleton;negative regulation of cell proliferation;negative regulation of progression through cell cycle;nucleus;plasma membrane;sensory perception of sound;structural molecule activity                                                                                                                                                                                                                                                                                  | Futreal et al 2004, Hahn and Weinberg 2002, Vogelstein and Kinzler 2004, Protein Kinase, Tumor Suppressor, Frameshift mutation, Large deletion, Missense mutation, Nonsense mutation, Splicing mutation |
| LIF     | leukemia inhibitory factor (cholinergic differentiation factor)                         | cell surface receptor linked signal transduction;cell-cell signaling;cytokine activity;extracellular region;extracellular space;growth factor activity;immune response;leukemia inhibitory factor receptor binding;multicellular organismal development;oncostatin-M receptor binding;positive regulation of cell proliferation                                                                                                                                                                                                  | Tumor Suppressor                                                                                                                                                                                        |
| OSM     | oncostatin M                                                                            | apoptosis;behavioral response to pain;cell proliferation;cell-cell signaling;cytokine activity;extracellular region;extracellular space;immune response;multicellular organismal development;negative regulation of cell proliferation;oncostatin-M receptor binding;peripheral nervous system development;regulation of cell growth;response to heat;tyrosine phosphorylation of Stat1 protein;tyrosine phosphorylation of Stat3 protein;tyrosine phosphorylation of Stat5 protein                                              | Tumor Suppressor                                                                                                                                                                                        |
| SEC14L2 | SEC14-like 2 (S. cerevisiae)                                                            | cytoplasm;integral to membrane;intracellular;nucleus;phospholipid binding;positive regulation of transcription, DNA-dependent;protein carrier activity;regulation of cholesterol biosynthetic process;transcription;transcriptional activator activity;transport;transporter activity;vitamin E binding                                                                                                                                                                                                                          | Tumor Suppressor                                                                                                                                                                                        |
| PES1    | pescadillo homolog 1, containing BRCT domain (zebrafish)                                | anatomical structure morphogenesis;cell proliferation;intracellular;nucleolus;nucleus;protein binding                                                                                                                                                                                                                                                                                                                                                                                                                            | Stability, Tumor Suppressor                                                                                                                                                                             |
| DUSP18  | dual specificity phosphatase 18                                                         | hydrolase activity;nucleus;protein amino acid dephosphorylation;protein tyrosine phosphatase activity;protein tyrosine/serine/threonine phosphatase activity                                                                                                                                                                                                                                                                                                                                                                     | Phosphatase                                                                                                                                                                                             |
| LIMK2   | LIM domain kinase 2                                                                     | ATP binding;cytoplasm;metal ion binding;nucleotide binding;nucleus;protein amino acid phosphorylation;protein binding;protein kinase activity;protein serine/threonine kinase activity;transferase activity;zinc ion binding                                                                                                                                                                                                                                                                                                     | Protein Kinase, Tyrosine Kinase                                                                                                                                                                         |
| PATZ1   | POZ (BTB) and AT hook containing zinc finger 1                                          | DNA binding;intracellular;metal ion binding;nucleus;protein binding;regulation of transcription, DNA-dependent;transcription;transcriptional repressor activity;zinc ion binding                                                                                                                                                                                                                                                                                                                                                 | Androgen Receptor, Futreal et al 2004, Mitelman 2000, Entrez Query;Oncogene, Translocation                                                                                                              |
| DRG1    | developmentally regulated GTP binding protein 1                                         | GTP binding;intracellular;multicellular organismal development;nucleotide binding;transcription;transcription factor binding                                                                                                                                                                                                                                                                                                                                                                                                     | Tumor Suppressor                                                                                                                                                                                        |
| YWHAH   | tyrosine 3-monooxygenase/tryptophan 5-monooxygenase activation protein, eta polypeptide | actin binding;cytoplasm;cytoskeleton organization and biogenesis;glucocorticoid catabolic process;glucocorticoid receptor binding;glucocorticoid receptor signaling pathway;insulin-like growth factor receptor binding;intracellular protein transport;negative regulation of apoptosis;negative regulation of dendrite morphogenesis;negative regulation of protein kinase activity;positive regulation of transcription;protein domain specific binding;protein kinase C inhibitor activity;regulation of mitosis;regulation  | Alpha6Beta4 Integrin, TNF_alpha_NF_kB, Tumor Suppressor                                                                                                                                                 |
| FBXO7   | F-box protein 7                                                                         | protein binding;regulation of protein stability;ubiquitin cycle;ubiquitin ligase complex;ubiquitin-dependent protein catabolic process;ubiquitin-protein ligase activity                                                                                                                                                                                                                                                                                                                                                         | Stability                                                                                                                                                                                               |
| TIMP3   | TIMP metalloproteinase inhibitor 3 (Sorsby fundus dystrophy, pseudoinflammatory)        | basement membrane;enzyme inhibitor activity;induction of apoptosis by extracellular signals;metalloendopeptidase inhibitor activity;molecular function;proteinaceous extracellular matrix;response to stimulus;transmembrane receptor protein tyrosine kinase signaling pathway;visual perception                                                                                                                                                                                                                                | Tumor Suppressor, Entrez Query;Oncogene                                                                                                                                                                 |
| TOM1    | target of myb1 (chicken)                                                                | cytosol;early endosome;endocytosis;endosome;endosome transport;intracellular;intracellular protein transport;lysosome;membrane;protein binding                                                                                                                                                                                                                                                                                                                                                                                   | Entrez Query;Oncogene                                                                                                                                                                                   |
| HMOX1   | heme oxygenase (decycling) 1                                                            | endoplasmic reticulum;heme oxidation;heme oxygenase (decycling) activity;iron ion binding;membrane fraction;metal ion binding;microsome;oxidoreductase activity;positive regulation of I-kappaB kinase/NF-kappaB cascade;signal transducer activity                                                                                                                                                                                                                                                                              | Protein Kinase                                                                                                                                                                                          |
| MCM5    | minichromosome maintenance complex component 5                                          | ATP binding;DNA binding;DNA replication;DNA replication initiation;DNA-dependent ATPase activity;nucleotide binding;nucleus;protein binding;regulation of progression through cell cycle;regulation of transcription, DNA-dependent;transcription                                                                                                                                                                                                                                                                                | TNF_alpha_NF_kB                                                                                                                                                                                         |
| MYH9    | myosin, heavy chain 9, non-muscle                                                       | actin cytoskeleton reorganization;actin filament binding;actin filament-based movement;angiogenesis;ATP binding;ATPase activity;blood vessel endothelial cell migration;calmodulin binding;cleavage furrow;contractile ring;cytokinesis;cytoplasm;cytosol;integrin complex;integrin-mediated signaling pathway;leukocyte migration;membrane protein ectodomain proteolysis;microfilament motor activity;monocyte differentiation;motor activity;myosin complex;nucleotide binding;nucleus;plasma membrane;platelet formation;pro | Futreal et al 2004, Stability, Translocation                                                                                                                                                            |
| CACNG2  | calcium channel, voltage-dependent, gamma subunit 2                                     | calcium ion binding;calcium ion transport;integral to membrane;ion transport;membrane;membrane fraction;regulation of membrane potential;structural molecule activity;tight junction;transmission of nerve impulse;voltage-gated calcium channel activity;voltage-gated calcium channel complex                                                                                                                                                                                                                                  | Stability                                                                                                                                                                                               |
| CSF2RB  | colony stimulating factor 2 receptor, beta, low-affinity (granulocyte-macrophage)       | cytokine and chemokine mediated signaling pathway;granulocyte macrophage colony-stimulating factor receptor complex;interleukin-3 receptor activity;interleukin-5 receptor activity;membrane;receptor activity;respiratory gaseous exchange;signal transduction                                                                                                                                                                                                                                                                  | Kit Receptor                                                                                                                                                                                            |

|        |                                                                                                 |                                                                                                                                                                                                                                                                                                                                                                                                                                                                                                                                                                                                                                                                                               |                                                                                                      |
|--------|-------------------------------------------------------------------------------------------------|-----------------------------------------------------------------------------------------------------------------------------------------------------------------------------------------------------------------------------------------------------------------------------------------------------------------------------------------------------------------------------------------------------------------------------------------------------------------------------------------------------------------------------------------------------------------------------------------------------------------------------------------------------------------------------------------------|------------------------------------------------------------------------------------------------------|
| MFNG   | MFNG O-fucosylpeptide 3-beta-N-acetylglucosaminyltransferase                                    | extracellular space;integral to membrane;membrane;pattern specification process;transferase activity, transferring glycosyl groups                                                                                                                                                                                                                                                                                                                                                                                                                                                                                                                                                            | NOTCH                                                                                                |
| POLR2F | polymerase (RNA) II (DNA directed) polypeptide F                                                | DNA binding;DNA-directed RNA polymerase activity;nucleus;regulation of transcription;RNA polymerase complex;transcription from RNA polymerase II promoter;transferase activity                                                                                                                                                                                                                                                                                                                                                                                                                                                                                                                | Protein Kinase                                                                                       |
| PICK1  | protein interacting with PRKCA 1                                                                | ATPase activity;cytoplasm;DNA methylation during embryonic development;DNA methylation during gametogenesis;dopamine transport;ephrin receptor binding;Golgi apparatus;GTPase binding;metabotropic glutamate receptor binding;mitochondrion;monoamine transport;multicellular organismal development;neuronal ion channel clustering;perinuclear region of cytoplasm;plasma membrane;presynaptic membrane;protein amino acid phosphorylation;protein C-terminus binding;protein homopolymerization;protein kinase C activation in utero embryonic development;nucleus;partitioning;protein dimerization                                                                                       | Protein Kinase                                                                                       |
| MAFF   | v-maf musculoaponeurotic fibrosarcoma oncogene homolog F (avian)                                | activity;regulation of epidermal cell differentiation;regulation of transcription, DNA-dependent;sequence-specific DNA binding;transcription;transcription factor activity;transcription from RNA polymerase II promoter                                                                                                                                                                                                                                                                                                                                                                                                                                                                      | Entrez Query:Oncogene                                                                                |
| CSNK1E | casein kinase 1, epsilon                                                                        | ATP binding;casein kinase 1 activity;DNA repair;nucleotide binding;protein amino acid phosphorylation;protein binding;protein serine/threonine kinase activity;signal transduction;transferase activity                                                                                                                                                                                                                                                                                                                                                                                                                                                                                       | Wnt, Protein Kinase, Stability                                                                       |
| DMC1   | DMC1 dosage suppressor of mck1 homolog, meiosis-specific homologous recombination (yeast)       | ATP binding;cell cycle;condensed nuclear chromosome;DNA binding;DNA metabolic process;DNA-dependent ATPase activity;female gamete generation;intracellular;meiosis;meiotic recombination;nucleoside-triphosphatase activity;nucleotide binding;nucleus;ovarian follicle development;spermatogenesis                                                                                                                                                                                                                                                                                                                                                                                           | Stability                                                                                            |
| CBY1   | chubby homolog 1 (Drosophila)                                                                   | beta-catenin binding;identical protein binding;negative regulation of transcription, DNA-dependent;negative regulation of Wnt receptor signaling pathway;nucleus;protein localization;trans-Golgi network                                                                                                                                                                                                                                                                                                                                                                                                                                                                                     | Tumor Suppressor                                                                                     |
| PDGFB  | platelet-derived growth factor beta polypeptide (simian sarcoma viral (v-sis) oncogene homolog) | cell proliferation;extracellular region;growth factor activity;membrane;platelet-derived growth factor receptor binding;regulation of progression through cell cycle;response to wounding                                                                                                                                                                                                                                                                                                                                                                                                                                                                                                     | Futreal et al 2004, Mitelman 2000, Vogelstein and Kinzler 2004, Entrez Query:Oncogene, Translocation |
| ATF4   | activating transcription factor 4 (tax-responsive enhancer element B67)                         | amino acid metabolic process;cytoplasm;gluconeogenesis;nucleus;positive regulation of transcription from RNA polymerase II promoter;protein dimerization activity;regulation of transcription, DNA-dependent;response to stress;sequence-specific DNA binding;specific RNA polymerase II transcription factor activity;transcription;transcription factor activity;transcriptional activator activity                                                                                                                                                                                                                                                                                         | Stability                                                                                            |
| MKL1   | megakaryoblastic leukemia (translocation) 1                                                     | actin binding;anti-apoptosis;cytoplasm;nucleic acid binding;nucleus;positive regulation of transcription;protein binding;regulation of transcription, DNA-dependent;transcription;transcription coactivator activity                                                                                                                                                                                                                                                                                                                                                                                                                                                                          | Futreal et al 2004, Mitelman 2000, Translocation                                                     |
| ST13   | suppression of tumorigenicity 13 (colon carcinoma) (Hsp70 interacting protein)                  | binding;cytoplasm;protein binding, bridging;protein folding                                                                                                                                                                                                                                                                                                                                                                                                                                                                                                                                                                                                                                   | Tumor Suppressor                                                                                     |
| RBX1   | ring-box 1                                                                                      | DNA repair;metal ion binding;nucleus;protein binding;protein catabolic process;ubiquitin cycle;zinc ion binding                                                                                                                                                                                                                                                                                                                                                                                                                                                                                                                                                                               | NOTCH, TGFBR, Stability                                                                              |
| EP300  | E1A binding protein p300                                                                        | acetyltransferase activity;apoptosis;cell cycle;heart development;histone acetylation;histone acetyltransferase activity;histone acetyltransferase complex;homeostatic process;lung development;metal ion binding;N-terminal peptidyl-lysine acetylation;nervous system development;nucleus;organ morphogenesis;positive regulation of transcription factor activity;positive regulation of transcription, DNA-dependent;protein C-terminus binding;response to hypoxia;signal transduction;somitogenesis;striated muscle development                                                                                                                                                         | Androgen Receptor, Kit Receptor, NOTCH, TGFBR, Wnt, Futreal et al 2004, Mitelman 2000, Translocation |
| XRCC6  | X-ray repair complementing defective repair in Chinese hamster cells 6 (Ku autoantigen, 70kDa)  | ATP-dependent DNA helicase activity;cytoplasm;DNA binding;DNA ligation;DNA recombination;DNA-dependent protein kinase complex;double-strand break repair via nonhomologous end joining;double-stranded DNA binding;membrane fraction;nucleus;positive regulation of transcription, DNA-dependent;protein binding;transcription factor complex                                                                                                                                                                                                                                                                                                                                                 | Stability                                                                                            |
| BIK    | BCL2-interacting killer (apoptosis-inducing)                                                    | membrane;membrane;mitochondrial envelope;protein binding;regulation of apoptosis                                                                                                                                                                                                                                                                                                                                                                                                                                                                                                                                                                                                              | Tumor Suppressor                                                                                     |
| PARVG  | parvin, gamma                                                                                   | actin binding;cell adhesion;cell-matrix adhesion;cytoskeleton;protein binding                                                                                                                                                                                                                                                                                                                                                                                                                                                                                                                                                                                                                 | Tumor Suppressor                                                                                     |
| PRR5   | proline rich 5 (renal)                                                                          | GTPase activator activity;intracellular;signal transduction                                                                                                                                                                                                                                                                                                                                                                                                                                                                                                                                                                                                                                   | Tumor Suppressor                                                                                     |
| FBLN1  | fibulin 1                                                                                       | calcium ion binding;extracellular matrix structural constituent;extracellular region;extracellular space;proteinaceous extracellular matrix;soluble fraction epidermis development;fatty acid transport;lipid metabolic process;metal ion binding;nucleus;positive regulation of fatty acid beta-oxidation;positive regulation of transcription;positive regulation of transcription from RNA polymerase II promoter;protein binding;receptor activity;regulation of fatty acid metabolic process;regulation of transcription, DNA-dependent;sequence-specific DNA binding;steroid hormone receptor activity;transcription;transcription factor activity;transcription from RNA polymerase II | Tumor Suppressor                                                                                     |
| GTSE1  | G-2 and S-phase expressed 1                                                                     | cytoplasmic microtubule;DNA damage response, signal transduction by p53 class mediator resulting in cell cycle arrest;G2 phase of mitotic cell cycle;microtubule-based process;molecular function                                                                                                                                                                                                                                                                                                                                                                                                                                                                                             | Tumor Suppressor                                                                                     |
| CERK   | ceramide kinase                                                                                 | calcium ion binding;ceramide kinase activity;ceramide metabolic process;diacylglycerol kinase activity;integral to membrane of membrane fraction;kinase activity;magnesium ion binding;protein kinase C activity;transferase activity                                                                                                                                                                                                                                                                                                                                                                                                                                                         | Protein Kinase                                                                                       |
| PIM3   | pim-3 oncogene                                                                                  | ATP binding;nucleotide binding;protein amino acid phosphorylation;protein kinase activity;protein serine/threonine kinase activity;transferase activity                                                                                                                                                                                                                                                                                                                                                                                                                                                                                                                                       | Protein Kinase, Entrez Query:Oncogene                                                                |
| PANX2  | pannexin 2                                                                                      | gap junction;integral to membrane;membrane                                                                                                                                                                                                                                                                                                                                                                                                                                                                                                                                                                                                                                                    | Tumor Suppressor                                                                                     |
