# Supplementary material for: Copy Number Alteration and Uniparental Disomy Analysis Categorizes Japanese Papillary Thyroid Carcinomas into Distinct Groups
Source: PubMed Central journal article supplement (PMC3340412; doi:10.1371/journal.pone.0036063), 2012-04-30
Supplement: pone.0036063.s006.pdf [file pone.0036063.s006.pdf]

**Supplemental Table S4. RAS family/MAPK pathway genes from CancerGenes database and PTC-related genes located in the CNA/UPD region**

| Cytoband                                                    | Genomic alteration | Case                  | Gene Symbol | Gene Name                                                                                                      |
|-------------------------------------------------------------|--------------------|-----------------------|-------------|----------------------------------------------------------------------------------------------------------------|
| 1p36.32 - 1p11.1                                            | Deletion           | T17                   | RAP1GAP     | RAP1 GTPase activating protein                                                                                 |
| 1q12-1q44                                                   | UPD                | T17                   | PTPN7       | protein tyrosine phosphatase, non-receptor type 7                                                              |
|                                                             |                    |                       | RAB13       | RAB13, member RAS oncogene family                                                                              |
|                                                             |                    |                       | RIT1        | Ras-like without CAAX 1                                                                                        |
|                                                             |                    |                       | RAB25       | RAB25, member RAS oncogene family                                                                              |
|                                                             |                    |                       | RASAL2      | RAS protein activator like 2                                                                                   |
| 1q12 - 1q44                                                 | UPD, Amplification | T17, T50              | RAB7L1      | RAB7, member RAS oncogene family-like 1                                                                        |
|                                                             |                    |                       | RASSF5      | Ras association (RalGDS/AF-6) domain family 5                                                                  |
|                                                             |                    |                       | RAB4A       | RAB4A, member RAS oncogene family                                                                              |
|                                                             |                    |                       | NTRK1       | neurotrophic tyrosine kinase, receptor, type 1                                                                 |
|                                                             |                    |                       | AKT3        | v-akt murine thymoma viral oncogene homolog 3 (protein kinase B, gamma)                                        |
|                                                             |                    |                       | miR-181b    |                                                                                                                |
| 3q26.31-3q29                                                | UPD                | T07                   | PIK3CA      | phosphoinositide-3-kinase, catalytic, alpha polypeptide                                                        |
| 4p15.1 - 4q12                                               | UPD                | T06                   | RHOH        | ras homolog gene family, member H                                                                              |
|                                                             |                    |                       | PDGFRA      | platelet-derived growth factor receptor, alpha polypeptide                                                     |
| 4q23 - 4q35.1                                               | UPD                | T06                   | RAB33B      | RAB33B, member RAS oncogene family                                                                             |
|                                                             |                    |                       | GAB1        | GRB2-associated binding protein 1                                                                              |
|                                                             |                    |                       | VEGFC       | vascular endothelial growth factor C                                                                           |
|                                                             |                    |                       | FGF2        | fibroblast growth factor 2 (basic)                                                                             |
| 7q31.32 - 7q36.3                                            | Amplification      | T32                   | BRAF        | v-raf murine sarcoma viral oncogene homolog B1                                                                 |
| 8p21.1 - 8q13.3                                             | UPD                | T07                   | FGFR1       | fibroblast growth factor receptor 1 (fms-related tyrosine kinase 2, Pfeiffer syndrome)                         |
|                                                             |                    |                       | RAB2A       | RAB2A, member RAS oncogene family                                                                              |
| 9p24.3 - 9q34.3                                             | Deletion           | T17                   | RASEF       | RAS and EF-hand domain containing                                                                              |
| 10q11.21 - 10q23.1                                          | UPD                | T06                   | RASSF4      | Ras association (RalGDS/AF-6) domain family 4                                                                  |
|                                                             |                    |                       | RET         | ret proto-oncogene                                                                                             |
|                                                             |                    |                       | KRAS        | v-Ki-ras2 Kirsten rat sarcoma viral oncogene homolog                                                           |
|                                                             |                    |                       | SSPN        | sarcospan (Kras oncogene-associated gene)                                                                      |
|                                                             |                    |                       | RAB5B       | RAB5B, member RAS oncogene family                                                                              |
|                                                             |                    |                       | RASSF3      | Ras association (RalGDS/AF-6) domain family 3                                                                  |
| 12p12.2 - 12q13.3,<br>12q13.2 - 12q21.2,<br>12q21.1-12q23.2 | UPD                | T23, T05              | RAP1B       | RAP1B, member of RAS oncogene family                                                                           |
|                                                             |                    |                       | RAB21       | RAB21, member RAS oncogene family                                                                              |
|                                                             |                    |                       | IGFBP6      | insulin-like growth factor binding protein 6                                                                   |
|                                                             |                    |                       | DUSP6       | dual specificity phosphatase 6                                                                                 |
|                                                             |                    |                       | PTPRR       | protein tyrosine phosphatase, receptor type, R                                                                 |
| 12q24.13                                                    | Deletion           | T17                   | RASAL1      | RAS protein activator like 1 (GAP1 like)                                                                       |
|                                                             |                    |                       | ERBB2       | v-erb-b2 erythroblastic leukemia viral oncogene homolog 2, neuro/glioblastoma derived oncogene homolog (avian) |
| 17q12 - 17q24.2                                             | UPD                | T05                   | NKIRAS2     | NFKB inhibitor interacting Ras-like 2                                                                          |
|                                                             |                    |                       | RAB5C       | RAB5C, member RAS oncogene family                                                                              |
|                                                             |                    |                       | DUSP3       | dual specificity phosphatase 3                                                                                 |
| 22q11.1 - 22q13.33                                          | Deletion           | T21, T19, T17,<br>T48 | RASL10A     | RAS-like, family 10, member A                                                                                  |
| Xq24 - Xq27.3                                               | UPD                | T06                   | RAB33A      | RAB33A, member RAS oncogene family                                                                             |
|                                                             |                    |                       | RAP2C       | RAP2C, member of RAS oncogene family                                                                           |
